# Supplementary material for: Characterization of Histone Modifications in Late-Stage Rotator Cuff Tendinopathy
Source: MDPI journal article supplement (doi:10.3390/genes14020496), 2023-02-15
Supplement: s1 [file s1]

## Supplementary Materials

**Table S1: Lysis Buffer (500µl)**

| Reagents Required                         | Required Volume (µl) |
|-------------------------------------------|----------------------|
| HEPES (0.5M)                              | 20                   |
| 10% SDS                                   | 50                   |
| Protease Inhibitor (ThermoFisher 1862209) | 5                    |
| NaBut (1M)                                | 5                    |
| dH <sub>2</sub> O                         | 420                  |

**Table S2: Decrosslinking Solution**

| Reagents Required                    | Required Volume (µl) |
|--------------------------------------|----------------------|
| Chromatin                            | 5 – 10               |
| NaCl (5M)                            | 4                    |
| Proteinase K (20µg/ml)               | 8                    |
| RNase (10mg/ml; ThermoFisher EN0531) | 4                    |
| dH <sub>2</sub> O                    | 85                   |

**Table S3: Elution Buffer**

| Stock Solution       | Final Concentration | Required Volume |
|----------------------|---------------------|-----------------|
| 10% SDS              | 0.5%                | 50µl            |
| 5M NaCl              | 300mM               | 60µl            |
| 0.5M EDTA            | 5mM                 | 10µl            |
| 1M Tris-HCl (pH 8.0) | 10mM                | 10µl            |
| dH <sub>2</sub> O    |                     | 870µl           |

**Table S4: Preparation of Invitrogen Dynabeads for Immunoprecipitation**

20µl per chromatin sample of beads (Invitrogen Dynabeads Protein A for Immunoprecipitation; 10001D) was taken and placed into 1.5ml Eppendorfs which was topped up to 500µl with dilution buffer including SDS and 0.1% BSA. Beads were then placed into a magnetic rack for 1 minute, or until solution was clear, and the supernatant was then removed. This process was repeated three times, resuspending the beads in 500µl of dilution buffer including SDS and 0.1% BSA every time. Beads were then resuspended in 400µl of dilution buffer including SDS and 0.1% BSA and the antibodies H3K27me3 (Cell Signalling; 9733), H3K4me3 (Cell Signalling; 97515) and H4K20me3 (Cell Signalling; 5737) were then added at a volume of 5µl equating to 1.5µg per chromatin sample and then rotated for 1 hour at RT.

**Table S5: Dilution Buffer (with SDS)**

| Stock Solution       | Final Concentration | Required Volume |
|----------------------|---------------------|-----------------|
| 10% SDS              | 0.01%               | 100µl           |
| 10% Triton x-100     | 1%                  | 1ml             |
| 0.5M EDTA            | 1.2mM               | 24µl            |
| 1M Tris-HCl (pH 8.0) | 16.7mM              | 167µl           |
| 5M NaCl              | 167mM               | 334µl           |
| BSA                  | 0.1%                | 133µl           |
| dH <sub>2</sub> O    |                     | 8.3ml           |

**Table S6: Dilution Buffer (without SDS)**

| Stock Solution       | Final Concentration | Required Volume |
|----------------------|---------------------|-----------------|
| 10% Triton x-100     | 1%                  | 1ml             |
| 0.5M EDTA            | 1.2mM               | 24µl            |
| 1M Tris-HCl (pH 8.0) | 16.7mM              | 167µl           |
| 5M NaCl              | 167mM               | 334µl           |
| dH <sub>2</sub> O    |                     | 8.3ml           |

**Table S7: Wash Buffer (1)**

| <b>Stock Solution</b> | <b>Final Concentration</b> | <b>Required Volume</b> |
|-----------------------|----------------------------|------------------------|
| 0.5M EDTA             | 2mM                        | 40µl                   |
| 1M Tris-HCl (pH 8.0)  | 20mM                       | 200µl                  |
| 10% Triton x-100      | 1%                         | 1ml                    |
| 10% SDS               | 0.1%                       | 100µl                  |
| 5M NaCl               | 150mM                      | 300µl                  |
| dH <sub>2</sub> O     |                            | 8.36ml                 |

**Table S8: Wash Buffer (2)**

| <b>Stock Solution</b> | <b>Final Concentration</b> | <b>Required Volume</b> |
|-----------------------|----------------------------|------------------------|
| 0.5M EDTA             | 2mM                        | 40µl                   |
| 1M Tris-HCl (pH 8.0)  | 20mM                       | 200µl                  |
| 10% Triton x-100      | 1%                         | 1ml                    |
| 10% SDS               | 0.1%                       | 100µl                  |
| 5M NaCl               | 500mM                      | 1ml                    |
| dH <sub>2</sub> O     |                            | 7.3ml                  |

**Table S9: Wash Buffer (3)**

| <b>Stock Solution</b> | <b>Final Concentration</b> | <b>Required Volume</b> |
|-----------------------|----------------------------|------------------------|
| 0.5M EDTA             | 1mM                        | 20µl                   |
| 1M Tris-HCl (pH 8.0)  | 10mM                       | 100µl                  |
| dH <sub>2</sub> O     |                            | 9.9ml                  |

**Table S10: Primer Combinations and Sequence Information for the Sequencing of ChIP-Seq Samples using Illumina NGS  
(Semitendinosus Samples)**

| Sample ID     | Index ID (i5 primer) | Index ID (i5 primer<br>sequence) | Index ID (i7 primer) | Index ID (i7 primer<br>sequence) |
|---------------|----------------------|----------------------------------|----------------------|----------------------------------|
| HA8 Input     | 504                  | TCAGAGCC                         | 710                  | TCCGCGAA                         |
| HA8 H3K4me3   | 501                  | AGGCTATA                         | 705                  | ATTCAGAA                         |
| HA8 H3K27me3  | 501                  | AGGCTATA                         | 709                  | CGGCTATG                         |
| HA9 Input     | 501                  | AGGCTATA                         | 711                  | TCTCGCGC                         |
| HA9 H3K4me3   | 502                  | GCCTCTAT                         | 705                  | ATTCAGAA                         |
| HA9 H3K27me3  | 502                  | GCCTCTAT                         | 709                  | CGGCTATG                         |
| HA10 Input    | 502                  | GCCTCTAT                         | 711                  | TCTCGCGC                         |
| HA10 H3K4me3  | 503                  | AGGATAGG                         | 705                  | ATTCAGAA                         |
| HA10 H3K27me3 | 503                  | AGGATAGG                         | 709                  | CGGCTATG                         |
| HA11 Input    | 503                  | AGGATAGG                         | 711                  | TCTCGCGC                         |
| HA11 H3K4me3  | 504                  | TCAGAGCC                         | 705                  | ATTCAGAA                         |
| HA11 H3K27me3 | 504                  | TCAGAGCC                         | 709                  | CGGCTATG                         |

Table 1: Dual Primer (NEB; E7600) combinations used for Illumina sequencing of chromatin obtained through ChIP-Seq from hamstring tendon (Semitendinosus) samples collected from patients undergoing routine arthroscopic anterior cruciate ligament reconstruction surgery.

**Table S11: Primer Combinations and Sequence Information for the Sequencing of ChIP-Seq Samples using Illumina NGS  
(Supraspinatus (RCT) Samples))**

| Sample ID      | Index ID (i5 primer) | Index ID (i5 primer<br>sequence) | Index ID (i7 primer) | Index ID (i7 primer<br>sequence) |
|----------------|----------------------|----------------------------------|----------------------|----------------------------------|
| RCT8 Input     | 504                  | TCAGAGCC                         | 711                  | TCTCGCGC                         |
| RCT8 H3K4me3   | 501                  | AGGCTATA                         | 706                  | GAATTCGT                         |
| RCT8 H3K27me3  | 501                  | AGGCTATA                         | 710                  | TCCGCGAA                         |
| RCT9 Input     | 501                  | AGGCTATA                         | 712                  | AGCGATAG                         |
| RCT9 H3K4me3   | 502                  | GCCTCTAT                         | 706                  | GAATTCGT                         |
| RCT9 H3K27me3  | 502                  | GCCTCTAT                         | 710                  | TCCGCGAA                         |
| RCT10 Input    | 502                  | GCCTCTAT                         | 712                  | AGCGATAG                         |
| RCT10 H3K4me3  | 503                  | AGGATAGG                         | 706                  | GAATTCGT                         |
| RCT10 H3K27me3 | 503                  | AGGATAGG                         | 710                  | TCCGCGAA                         |
| RCT11 Input    | 504                  | TCAGAGCC                         | 701                  | ATTACTCG                         |
| RCT11 H3K4me3  | 501                  | AGGCTATA                         | 702                  | TCCGGAGA                         |
| RCT11 H3K27me3 | 502                  | GCCTCTAT                         | 702                  | TCCGGAGA                         |
| RCT12 Input    | 504                  | TCAGAGCC                         | 702                  | TCCGGAGA                         |
| RCT12 H3K4me3  | 503                  | AGGATAGG                         | 703                  | CGCTCATT                         |
| RCT12 H3K27me3 | 502                  | GCCTCTAT                         | 703                  | CGCTCATT                         |

Table 2: Dual Primer (NEB; E7600) combinations used for Illumina sequencing of chromatin obtained through ChIP-Seq from diseased supraspinatus samples collected from arthroscopic shoulder surgery to repair rotator cuff tears.

**Table S12: Homer Data from Peak Annotation of Significant Peaks Identified for H3K4me3**

| Gene Name    | Nearest Ensembl | Gene Description                                    | Gene Type      | Annotation               | Distance to TSS |
|--------------|-----------------|-----------------------------------------------------|----------------|--------------------------|-----------------|
| SHROOM3      | ENSG00000138771 | shroom family member 3                              | protein-coding | Intron<br>(1 of 10)      | 1052            |
| PHF14        | ENSG00000106443 | PHD finger protein 14                               | protein-coding | Intergenic               | 220260          |
| LOC100240735 | ENSG00000250654 | uncharacterized LOC100240735                        | ncRNA          | Intron (1 of 2)          | 1143            |
| SIM2         | ENSG00000159263 | SIM bHLH transcription factor 2                     | protein-coding | Intron (1 of 9)          | 1320            |
| DKK2         | ENSG00000155011 | dickkopf WNT signalling pathway inhibitor 2         | protein-coding | Intergenic               | -174945         |
| POLRMT       | ENSG00000099821 | RNA polymerase mitochondrial                        | protein-coding | TTS                      | 17307           |
| LINC01476    | ENSG00000265313 | long intergenic non-protein coding RNA 1476         | ncRNA          | Intron (2 of 2)          | 26312           |
| JAG2         | ENSG00000184916 | jagged canonical Notch ligand 2                     | protein-coding | 5' UTR<br>(Exon 1 of 26) | 273             |
| CAMK2B       | ENSG00000058404 | calcium/calmodulin dependent protein kinase II beta | protein-coding | Intron<br>(1 of 18)      | 351             |
| DACT2        | ENSG00000164488 | dishevelled binding antagonist of beta catenin 2    | protein-coding | Intron (1 of 5)          | 400             |
| MCF2L        | ENSG00000126217 | MCF.2 cell line derived transforming sequence like  | protein-coding | Intron (4 of 27)         | 20212           |
| CTAGE1       | ENSG00000212710 | cutaneous T cell lymphoma-associated antigen 1      | protein-coding | Intergenic               | 69187           |
| CELF2        | ENSG00000048740 | CUGBP Elav-like family member 2                     | protein-coding | promoter-TSS             | -157            |

|        |                 |                                               |                |                  |       |
|--------|-----------------|-----------------------------------------------|----------------|------------------|-------|
| HMX1   | ENSG00000215612 | H6 family homeobox 1                          | protein-coding | promoter-TSS     | 82    |
|        |                 |                                               |                | intron           |       |
| EMX2OS | ENSG00000229847 | EMX2 opposite strand/antisense RNA            | ncRNA          | (Intron 1 of 1)  | 897   |
|        |                 |                                               |                | intron           |       |
| MBP    | ENSG00000197971 | Myelin basic protein                          | protein-coding | (Intron 1 of 3)  | 2083  |
|        |                 |                                               |                | Exon             |       |
| GALR3  | ENSG00000128310 | Galanin receptor 3                            | protein-coding | (Exon 2 of 2)    | 1581  |
|        |                 |                                               |                | intron           |       |
| SMOC2  | ENSG00000112562 | SPARC related modular calcium binding 2       | protein-coding | (Intron 1 of 12) | 357   |
| TAFA5  | ENSG00000219438 | TAFA chemokine like family member 5           | protein-coding | promoter-TSS     | -228  |
|        |                 |                                               |                | 5' UTR           |       |
| AJAP1  | ENSG00000196581 | Adherens junctions associated protein 1       | protein-coding | (Exon 1 of 6)    | 695   |
| MSX2   | ENSG00000120149 | msh homeobox 2                                | protein-coding | Intergenic       | -3339 |
|        |                 | ArfGAP with GTPase domain, ankyrin repeat and |                |                  |       |
| AGAP3  | ENSG00000133612 | PH domain 3                                   | protein-coding | exon (1 of 9)    | 462   |
| CRMP1  | ENSG00000072832 | Collapsin response mediator protein 1         | protein-coding | exon (1 of 14)   | 219   |
| PCSK6  | ENSG00000140479 | Proprotein convertase subtilisin/kexin type 6 | protein-coding | exon (1 of 20)   | 292   |
| CDH4   | ENSG00000179242 | Cadherin 4                                    | protein-coding | intron (1 of 15) | 1104  |

S12: Simplified Table received from running Homer on the 25 significant peaks identified for H3K4me3 using the DESeq2 data. Here, 25 genes were identified as being nearby to a significant peak, with 22 of these being protein-coding genes, and 3 being ncRNAs.

**Table S13: Homer Data from Peak Annotation of Significant Peaks Identified for H3K27me3 (DESeq2)**

| Gene Name    | Nearest Ensembl | Gene Description                                                        | Gene Type      | Annotation    | Distance to TSS |
|--------------|-----------------|-------------------------------------------------------------------------|----------------|---------------|-----------------|
| EMBP1        | ENSG00000231752 | embigin pseudogene 1                                                    | Pseudo         | Intergenic    | 1311156         |
| NKX3-2       | ENSG00000109705 | NK3 homeobox 2                                                          | protein-coding | TTS           | 4340            |
| LOC101927151 | ENSG00000267575 | uncharacterized LOC101927151                                            | ncRNA          | Intergenic    | -1688017        |
| FAM230C      | ENSG00000279516 | family with sequence similarity 230 member C                            | ncRNA          | Intergenic    | -1114828        |
| LOC101927050 |                 | lysine methyltransferase 2C pseudogene                                  | Pseudo         | Intergenic    | -199427         |
| NTN1         | ENSG00000065320 | netrin 1                                                                | protein-coding | Exon (2 of 7) | 1437            |
| FAM230C      | ENSG00000279516 | family with sequence similarity 230 member C                            | ncRNA          | Intergenic    | -842732         |
| CWH43        | ENSG00000109182 | cell wall biogenesis 43 C-terminal homolog                              | protein-coding | Intergenic    | 169851          |
| CWH43        | ENSG00000109182 | cell wall biogenesis 43 C-terminal homolog                              | protein-coding | Intergenic    | 653828          |
| SPIN4        | ENSG00000186767 | spindlin family member 4                                                | protein-coding | Intergenic    | 852862          |
| SIM2         | ENSG00000159263 | SIM bHLH transcription factor 2                                         | protein-coding | Intergenic    | -2423           |
| LOC441666    | ENSG00000215146 | zinc finger protein 91 pseudogene                                       | Pseudo         | Intergenic    | 455850          |
| ALG10B       | ENSG00000175548 | ALG10 alpha-1,2-glucosyltransferase B                                   | protein-coding | Intergenic    | -1051132        |
| ANKRD30BP2   |                 | ankyrin repeat domain 30B pseudogene 2                                  | Pseudo         | Intergenic    | -1003024        |
| HCN1         | ENSG00000164588 | hyperpolarization activated cyclic nucleotide gated potassium channel 1 | protein-coding | Intergenic    | -1988254        |
| FRG1CP       | ENSG00000282826 | FSHD region gene 1 family member C, pseudogene                          | Pseudo         | Intergenic    | 104766          |
| LOC441666    | ENSG00000215146 | zinc finger protein 91 pseudogene                                       | Pseudo         | Intergenic    | 478902          |
| FRG1CP       | ENSG00000282826 | FSHD region gene 1 family member C, pseudogene                          | Pseudo         | Intergenic    | -42356          |
| EMBP1        | ENSG00000231752 | embigin pseudogene 1                                                    | Pseudo         | Intergenic    | 1539728         |
| CWH43        | ENSG00000109182 | cell wall biogenesis 43 C-terminal homolog                              | protein-coding | Intergenic    | 110442          |
| CWH43        | ENSG00000109182 | cell wall biogenesis 43 C-terminal homolog                              | protein-coding | Intergenic    | 167740          |



|              |                 |                                                                            |                |                     |          |
|--------------|-----------------|----------------------------------------------------------------------------|----------------|---------------------|----------|
| HS3ST5       | ENSG00000249853 | heparan sulfate-glucosamine 3-sulfotransferase 5                           | protein-coding | Intergenic          | -279325  |
| EMB          | ENSG00000170571 | embigin                                                                    | protein-coding | Intergenic          | 782899   |
| CALB1        | ENSG00000104327 | calbindin 1                                                                | protein-coding | Intron<br>(2 of 10) | 1462     |
| EMBP1        | ENSG00000231752 | embigin pseudogene 1                                                       | Pseudo         | Intergenic          | 1588509  |
| CWH43        | ENSG00000109182 | cell wall biogenesis 43 C-terminal homolog                                 | protein-coding | Intergenic          | 135230   |
| CHEK2P2      | ENSG00000259156 | checkpoint kinase 2 pseudogene 2                                           | Pseudo         | Intergenic          | -504131  |
| UBBP4        | ENSG00000263563 | ubiquitin B pseudogene 4                                                   | Pseudo         | Intergenic          | -229366  |
| CHEK2P2      | ENSG00000259156 | checkpoint kinase 2 pseudogene 2                                           | Pseudo         | Intergenic          | -506916  |
| LOC101927151 | ENSG00000267575 | uncharacterized LOC101927151                                               | ncRNA          | Intergenic          | -1673181 |
| CWH43        | ENSG00000109182 | cell wall biogenesis 43 C-terminal homolog                                 | protein-coding | Intergenic          | 142524   |
| EMBP1        | ENSG00000231752 | embigin pseudogene 1                                                       | pseudo         | Intergenic          | 1666792  |
| EMB          | ENSG00000170571 | embigin                                                                    | protein-coding | Intergenic          | 828879   |
| SRCIN1       | ENSG00000277363 | SRC kinase signalling inhibitor 1                                          | protein-coding | Exon<br>(7 of 19)   | 43872    |
| ZNF716       | ENSG00000182111 | zinc finger protein 716                                                    | protein-coding | Intergenic          | 2304926  |
| EMB          | ENSG00000170571 | embigin                                                                    | protein-coding | Intergenic          | 1999657  |
| LOC101927151 | ENSG00000267575 | uncharacterized LOC101927151                                               | ncRNA          | Intergenic          | -1705972 |
| HAVCR1P1     | ENSG00000268442 | hepatitis A virus cellular receptor 1 pseudogene 1                         | pseudo         | Intergenic          | -729516  |
| HAVCR1P1     | ENSG00000268442 | hepatitis A virus cellular receptor 1 pseudogene 1                         | pseudo         | Intergenic          | -497416  |
| HCN1         | ENSG00000164588 | hyperpolarization activated cyclic nucleotide<br>gated potassium channel 1 | protein-coding | Intergenic          | -1939864 |
| MIR4265      | ENSG00000264934 | microRNA 4265                                                              | ncRNA          | Intron<br>(1 of 9)  | -58001   |
| HAVCR1P1     | ENSG00000268442 | hepatitis A virus cellular receptor 1 pseudogene 1                         | pseudo         | Intergenic          | -1797201 |
| HCN1         | ENSG00000164588 | hyperpolarization activated cyclic nucleotide<br>gated potassium channel 1 | protein-coding | Intergenic          | -1949044 |
| LOC101927050 |                 | lysine methyltransferase 2C pseudogene                                     | pseudo         | Intergenic          | -752912  |
| EPHA3        | ENSG00000044524 | EPH receptor A3                                                            | protein-coding | Intergenic          | 1382666  |

|              |                 |                                                    |                |                             |          |
|--------------|-----------------|----------------------------------------------------|----------------|-----------------------------|----------|
| ZXDA         | ENSG00000198205 | zinc finger X-linked duplicated A                  | protein-coding | Intergenic                  | -630818  |
| EMB          | ENSG00000170571 | embigin                                            | protein-coding | Intergenic                  | 807775   |
| LOC101927050 |                 | lysine methyltransferase 2C pseudogene             | pseudo         | Intergenic                  | -751874  |
| LOC441666    | ENSG00000215146 | zinc finger protein 91 pseudogene                  | pseudo         | Intergenic                  | 503199   |
| LMTK3        | ENSG00000142235 | lemur tyrosine kinase 3                            | protein-coding | Exon<br>(12 of 16)          | 13494    |
| LOC101927050 |                 | lysine methyltransferase 2C pseudogene             | pseudo         | Intergenic                  | -750203  |
| LINC02167    | ENSG00000261122 | long intergenic non-protein coding RNA 2167        | ncRNA          | Intergenic                  | 2520060  |
| CCNYL3       |                 | cyclin Y like 3 (pseudogene)                       | pseudo         | Intergenic                  | 104256   |
| EFNA5        | ENSG00000184349 | ephrin A5                                          | protein-coding | Intron<br>(1 of 4)          | 494      |
| GDF7         | ENSG00000143869 | growth differentiation factor 7                    | protein-coding | Exon<br>(2 of 2)            | 3607     |
| EMX2OS       | ENSG00000229847 | EMX2 opposite strand/antisense RNA                 | ncRNA          | non-coding<br>(Exon 1 of 4) | 188      |
| LOC441666    | ENSG00000215146 | zinc finger protein 91 pseudogene                  | pseudo         | Intergenic                  | 490083   |
| SPIN4        | ENSG00000186767 | spindlin family member 4                           | protein-coding | Intergenic                  | 879106   |
| LOC441666    | ENSG00000215146 | zinc finger protein 91 pseudogene                  | pseudo         | Intergenic                  | 497274   |
| EMX2         | ENSG00000170370 | empty spiracles homeobox 2                         | protein-coding | Intron<br>(2 of 3)          | -7873    |
| LOC101927050 |                 | lysine methyltransferase 2C pseudogene             | pseudo         | Intergenic                  | -761276  |
| EMB          | ENSG00000170571 | embigin                                            | protein-coding | Intergenic                  | 1703811  |
| SPIN4        | ENSG00000186767 | spindlin family member 4                           | protein-coding | Intergenic                  | 885606   |
| EMB          | ENSG00000170571 | embigin                                            | protein-coding | Intergenic                  | 825628   |
| EMB          | ENSG00000170571 | embigin                                            | protein-coding | Intergenic                  | 1935371  |
| HAVCR1P1     | ENSG00000268442 | hepatitis A virus cellular receptor 1 pseudogene 1 | pseudo         | Intergenic                  | -1355330 |
| LOC101927050 |                 | lysine methyltransferase 2C pseudogene             | pseudo         | Intergenic                  | -190662  |
| DEFB115      | ENSG00000215547 | defensin beta 115                                  | protein-coding | Intergenic                  | -99861   |
|              | ENSG00000164588 | hyperpolarization activated cyclic nucleotide      | protein-coding | Intergenic                  | -2039062 |

|              |                 |                                                       |                |                 |          |
|--------------|-----------------|-------------------------------------------------------|----------------|-----------------|----------|
| HCN1         |                 | gated potassium channel 1                             |                |                 |          |
| ZNF733P      | ENSG00000185037 | zinc finger protein 733, pseudogene                   | pseudo         | Intergenic      | 794670   |
| DCUN1D4      | ENSG00000109184 | defective in cullin neddylation 1 domain containing 4 | protein-coding | Intergenic      | -735582  |
| LINC01262    | ENSG00000250739 | long intergenic non-protein coding RNA 1262           | ncRNA          | Intergenic      | -424404  |
| SPATA31A5    | ENSG00000276581 | SPATA31 subfamily A member 5                          | protein-coding | Intergenic      | -235081  |
| LOC101927151 | ENSG00000267575 | uncharacterized LOC101927151                          | ncRNA          | Intergenic      | -868899  |
| LOC101927151 | ENSG00000267575 | uncharacterized LOC101927151                          | ncRNA          | Intergenic      | -656725  |
| EMBP1        | ENSG00000231752 | embigin pseudogene 1                                  | pseudo         | Intergenic      | 1484062  |
| LOC101927050 |                 | lysine methyltransferase 2C pseudogene                | pseudo         | Intergenic      | -758000  |
| UBBP4        | ENSG00000263563 | ubiquitin B pseudogene 4                              | pseudo         | Intergenic      | -229901  |
| GDF6         | ENSG00000156466 | growth differentiation factor 6                       | protein-coding | Intron (1 of 1) | 2288     |
| UBBP4        | ENSG00000263563 | ubiquitin B pseudogene 4                              | pseudo         | Intergenic      | -234175  |
| CHEK2P2      | ENSG00000259156 | checkpoint kinase 2 pseudogene 2                      | pseudo         | Intergenic      | -501781  |
| EMB          | ENSG00000170571 | embigin                                               | protein-coding | Intergenic      | 2282693  |
| HAVCR1P1     | ENSG00000268442 | hepatitis A virus cellular receptor 1 pseudogene 1    | pseudo         | Intergenic      | -1063362 |
| BTN3A2       | ENSG00000186470 | butyrophilin subfamily 3 member A2                    | protein-coding | Intergenic      | -33738   |
| LOC101927151 | ENSG00000267575 | uncharacterized LOC101927151                          | ncRNA          | Intergenic      | -1007435 |
| EMB          | ENSG00000170571 | embigin                                               | protein-coding | Intergenic      | 1309158  |
| EMBP1        | ENSG00000231752 | embigin pseudogene 1                                  | pseudo         | Intergenic      | 2190397  |
| CWH43        | ENSG00000109182 | cell wall biogenesis 43 C-terminal homolog            | protein-coding | Intergenic      | 149393   |
| LOC101927050 |                 | lysine methyltransferase 2C pseudogene                | pseudo         | Intergenic      | -744660  |
| EMBP1        | ENSG00000231752 | embigin pseudogene 1                                  | pseudo         | Intergenic      | 2579884  |
| CWH43        | ENSG00000109182 | cell wall biogenesis 43 C-terminal homolog            | protein-coding | Intergenic      | 153082   |
| CWH43        | ENSG00000109182 | cell wall biogenesis 43 C-terminal homolog            | protein-coding | Intergenic      | 663896   |
| LINC02167    | ENSG00000261122 | long intergenic non-protein coding RNA 2167           | ncRNA          | Intergenic      | 2531604  |
| ALG10B       | ENSG00000175548 | ALG10 alpha-1,2-glucosyltransferase B                 | protein-coding | Intergenic      | -1079658 |
| DEFB115      | ENSG00000215547 | defensin beta 115                                     | protein-coding | Intergenic      | -33433   |

|              |                 |                                                                         |                |              |          |
|--------------|-----------------|-------------------------------------------------------------------------|----------------|--------------|----------|
| POTEA        | ENSG00000188877 | POTE ankyrin domain family member A                                     | protein-coding | Intergenic   | -53734   |
| SPIN4        | ENSG00000186767 | spindlin family member 4                                                | protein-coding | Intergenic   | 851906   |
| EMX2OS       | ENSG00000229847 | EMX2 opposite strand/antisense RNA                                      | ncRNA          | Intergenic   | -9334    |
| ALG10B       | ENSG00000175548 | ALG10 alpha-1,2-glucosyltransferase B                                   | protein-coding | Intergenic   | -1077016 |
| LOC101927050 |                 | lysine methyltransferase 2C pseudogene                                  | pseudo         | Intergenic   | -746641  |
|              |                 |                                                                         |                | Intron       |          |
| SIM2         | ENSG00000159263 | SIM bHLH transcription factor 2                                         | protein-coding | (1 of 9)     | 8928     |
| CWH43        | ENSG00000109182 | cell wall biogenesis 43 C-terminal homolog                              | protein-coding | Intergenic   | 723988   |
| LOC441666    | ENSG00000215146 | zinc finger protein 91 pseudogene                                       | pseudo         | Intergenic   | 493103   |
| EMB          | ENSG00000170571 | embigin                                                                 | protein-coding | Intergenic   | 823535   |
| INHBB        | ENSG00000163083 | inhibin subunit beta B                                                  | protein-coding | Intergenic   | -1694    |
| LINC02167    | ENSG00000261122 | long intergenic non-protein coding RNA 2167                             | ncRNA          | Intergenic   | 2529990  |
| LOC101927050 |                 | lysine methyltransferase 2C pseudogene                                  | pseudo         | Intergenic   | -759337  |
| LOC101927050 |                 | lysine methyltransferase 2C pseudogene                                  | pseudo         | Intergenic   | -763231  |
| ZNF716       | ENSG00000182111 | zinc finger protein 716                                                 | protein-coding | Intergenic   | 1081340  |
| LOC101927151 | ENSG00000267575 | uncharacterized LOC101927151                                            | ncRNA          | Intergenic   | -1326024 |
| RIPK4        | ENSG00000183421 | receptor interacting serine/threonine kinase 4                          | protein-coding | promoter-TSS | -143     |
| EMB          | ENSG00000170571 | embigin                                                                 | protein-coding | Intergenic   | 2265223  |
| EMX2OS       | ENSG00000229847 | EMX2 opposite strand/antisense RNA                                      | ncRNA          | Intergenic   | -6972    |
| HCN1         | ENSG00000164588 | hyperpolarization activated cyclic nucleotide gated potassium channel 1 | protein-coding | Intergenic   | -2285612 |
| ROCK1        | ENSG00000067900 | Rho associated coiled-coil containing protein kinase 1                  | protein-coding | Intergenic   | 172462   |
| HAVCR1P1     | ENSG00000268442 | hepatitis A virus cellular receptor 1 pseudogene 1                      | pseudo         | Intergenic   | -1185195 |
|              |                 |                                                                         |                | Intron       |          |
| MBP          | ENSG00000197971 | myelin basic protein                                                    | protein-coding | (1 of 3)     | 1059     |
| SPIN4        | ENSG00000186767 | spindlin family member 4                                                | protein-coding | Intergenic   | 887614   |
| EMB          | ENSG00000170571 | embigin                                                                 | protein-coding | Intergenic   | 1384575  |
| HAVCR1P1     | ENSG00000268442 | hepatitis A virus cellular receptor 1 pseudogene 1                      | pseudo         | Intergenic   | -1624689 |

|              |                 |                                                                         |                |            |          |
|--------------|-----------------|-------------------------------------------------------------------------|----------------|------------|----------|
| LOC101927151 | ENSG00000267575 | uncharacterized LOC101927151                                            | ncRNA          | Intergenic | -1604413 |
| EMB          | ENSG00000170571 | embigin                                                                 | protein-coding | Intergenic | 824782   |
| LOC101927151 | ENSG00000267575 | uncharacterized LOC101927151                                            | ncRNA          | Intergenic | -1710614 |
| EMB          | ENSG00000170571 | embigin                                                                 | protein-coding | Intergenic | 827950   |
| ZNF716       | ENSG00000182111 | zinc finger protein 716                                                 | protein-coding | Intergenic | 2452972  |
| CHEK2P2      | ENSG00000259156 | checkpoint kinase 2 pseudogene 2                                        | pseudo         | Intergenic | -498916  |
| LOC101927050 |                 | lysine methyltransferase 2C pseudogene                                  | pseudo         | Intergenic | -748126  |
| EMBP1        | ENSG00000231752 | embigin pseudogene 1                                                    | pseudo         | Intergenic | 1928516  |
| CWH43        | ENSG00000109182 | cell wall biogenesis 43 C-terminal homolog                              | protein-coding | Intergenic | 145178   |
| LOC101927050 |                 | lysine methyltransferase 2C pseudogene                                  | pseudo         | Intergenic | -745868  |
| HAVCR1P1     | ENSG00000268442 | hepatitis A virus cellular receptor 1 pseudogene 1                      | pseudo         | Intergenic | -917305  |
| HCN1         | ENSG00000164588 | hyperpolarization activated cyclic nucleotide gated potassium channel 1 | protein-coding | Intergenic | -1715856 |
| EMB          | ENSG00000170571 | embigin                                                                 | protein-coding | Intergenic | 1121195  |
| CWH43        | ENSG00000109182 | cell wall biogenesis 43 C-terminal homolog                              | protein-coding | Intergenic | 150356   |
| EMBP1        | ENSG00000231752 | embigin pseudogene 1                                                    | pseudo         | Intergenic | 2419884  |
| DEFB115      | ENSG00000215547 | defensin beta 115                                                       | protein-coding | Intergenic | -91806   |
| SPIN4        | ENSG00000186767 | spindlin family member 4                                                | protein-coding | Intergenic | 851040   |
| OR11H1       | ENSG00000130538 | olfactory receptor family 11 subfamily H member 1                       | protein-coding | Intergenic | -1172563 |
| LOC441666    | ENSG00000215146 | zinc finger protein 91 pseudogene                                       | pseudo         | Intergenic | 506098   |
| LOC441666    | ENSG00000215146 | zinc finger protein 91 pseudogene                                       | pseudo         | Intergenic | 454427   |
| EMB          | ENSG00000170571 | embigin                                                                 | protein-coding | Intergenic | 818667   |
| LOC441666    | ENSG00000215146 | zinc finger protein 91 pseudogene                                       | pseudo         | Intergenic | 500773   |
| ZNF733P      | ENSG00000185037 | zinc finger protein 733, pseudogene                                     | pseudo         | Intergenic | 2532518  |
| EMB          | ENSG00000170571 | embigin                                                                 | protein-coding | Intergenic | 822718   |
| LOC101927050 |                 | lysine methyltransferase 2C pseudogene                                  | pseudo         | Intergenic | -754529  |

S13: Simplified table received from running Homer on the 145 significant peaks identified for H3K27me3 using the DESeq2. Here, 45 genes were identified as being nearby to a significant peak, with 29 of these being protein-coding genes, 10 being pseudogenes and 6 being ncRNAs. Additionally, some genes,

such as EMB (embigin) and CWH43 (cell wall biogenesis 43 C-terminal homolog) had multiple peak locations (not shown in simplified data set) identified in intergenic regions of this gene.
